# Supplementary material
Source: PubMed Central journal article supplement (PMC7442749)

Source Data for Extended Data 4a.

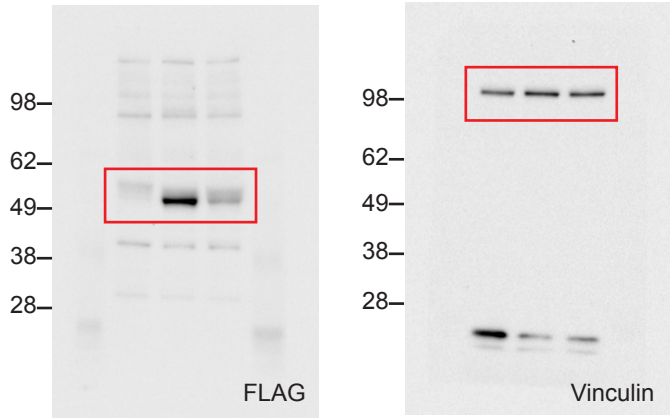

Supplement: NIHMS1600618-supplement-1600618_SourceData_ExtData_Fig4.pdf [file NIHMS1600618-supplement-1600618_SourceData_ExtData_Fig4.pdf]

Source Data for Figure 3b.

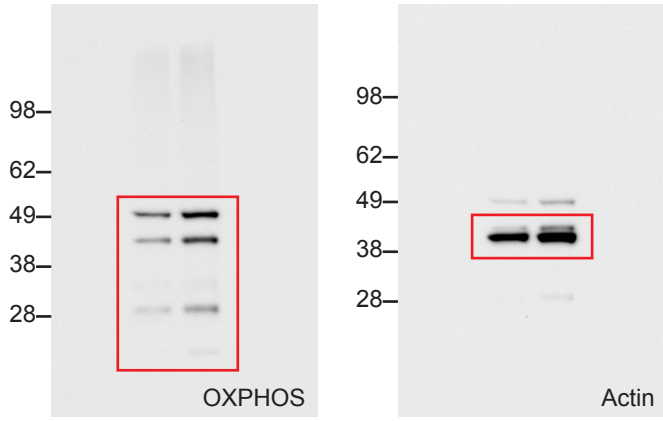

Supplement: NIHMS1600618-supplement-1600618_SourceData_Fig3.pdf [file NIHMS1600618-supplement-1600618_SourceData_Fig3.pdf]
